# Supplementary material for: Exposure to 16 h of normobaric hypoxia induces ionic edema in the healthy brain
Source: PubMed Central journal article supplement (PMC8514510; doi:10.1038/s41467-021-26116-y), 2021-10-13
Supplement: 41467_2021_26116_MOESM1_ESM.pdf [file 41467_2021_26116_MOESM1_ESM.pdf]

# Supplementary Information

## *Exposure to 16 Hours of Normobaric Hypoxia induces Ionic Edema in the Healthy Brain*

### Supplementary Methods

#### Magnetic resonance imaging

##### Morphometry

Images were motion corrected and averaged <sup>1</sup> across multiple acquired volumetric T1-weighted images. Image post-processing steps further included removal of non-brain tissue using a hybrid watershed and surface deformation procedure <sup>2</sup>, automated Talairach transformation, segmentation of subcortical white matter and deep gray matter volumetric structures <sup>3,4</sup>, intensity normalization <sup>5</sup>, tessellation of the gray matter - white matter boundary and automated topology correction <sup>6,7</sup>. To extract reliable volume estimates, images were uniformly post-processed with the longitudinal stream <sup>8</sup> in FreeSurfer. During the procedure an unbiased within-subject template space and image was created using robust, inverse consistent registration <sup>1</sup>. Several subsequent processing steps, such as skull stripping, Talairach transforms, atlas registration as well as spherical surface maps and parcellations relied on information from this within-subject template, significantly increasing reliability and statistical power <sup>8</sup>.

### Supplementary Figures

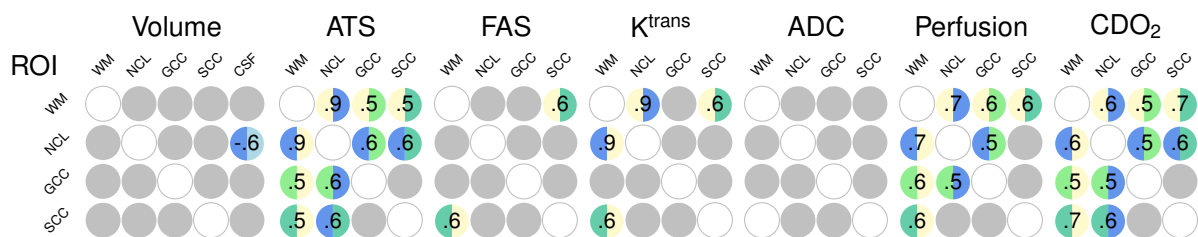

**Supplementary Figure 1.** Intra-modal correlations between changes in brain volume, ATS and FAS signals, K<sup>trans</sup>, ADC values, perfusion and CDO<sub>2</sub> between all ROIs.

WM = white matter; NCL = nucleus lentiformis; GCC = genu corporis callosi; SCC = splenium corporis callosi; CSF = cerebrospinal fluid.

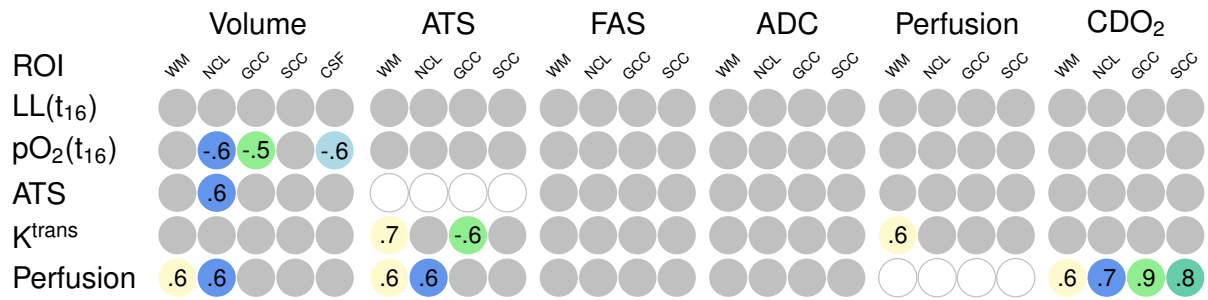

**Supplementary Figure 2.** Inter-modal correlations between changes in pO<sub>2</sub> (t<sub>16</sub>), brain volume, ATS and FAS signals, K<sup>trans</sup>, perfusion, and CDO<sub>2</sub> for each ROI. Naming conventions as in Supplementary Figure 1.

## Supplementary Tables

**Supplementary Table 1.** Medication.

| ID | Ibuprofen (dose and time point relative to the start of the experiment) | Motillium (dose and time point relative to the start of the experiment) |
|----|-------------------------------------------------------------------------|-------------------------------------------------------------------------|
| 1  | 400 mg, 2 h 15 min; 400 mg, 9 h 15 min;                                 | 2 ml, 3 h 15 min                                                        |
| 2  | 400 mg, 9 h                                                             |                                                                         |
| 3  |                                                                         |                                                                         |
| 4  |                                                                         |                                                                         |
| 5  | 400 mg, 4 h 40 min                                                      |                                                                         |
| 6  | 400 mg, 7 h                                                             |                                                                         |
| 7  | 400 mg, 5 h 45 min; 400 mg, 10 h 45 min; 400 mg, 14 h                   |                                                                         |
| 8  | 400 mg, 9 h 30 min                                                      |                                                                         |
| 9  |                                                                         |                                                                         |
| 10 |                                                                         |                                                                         |
| 11 | 400 mg, 8 h 45 min; 400 mg, 9 h 45 min                                  |                                                                         |
| 12 |                                                                         |                                                                         |
| 13 | 400 mg, 2 h 30 min; 600 mg, 6 h 15 min                                  | 2 ml, 1 h 15 min                                                        |
| 14 |                                                                         |                                                                         |
| 15 |                                                                         |                                                                         |
| 16 | 400 mg, 5 h; 400 mg, 16 h                                               | 2 ml, 5 h; 2 ml, 7 h 30 min; 2 ml, 9 h 30 min; 2 ml, 16 h               |
| 17 |                                                                         |                                                                         |
| 18 |                                                                         |                                                                         |
| 19 | 400 mg, 5 h 45 min                                                      |                                                                         |
| 20 | 400 mg, 8 h                                                             | 2 ml, 8 h                                                               |
| 21 |                                                                         | 2 ml, 5 h 50 min                                                        |
| 22 |                                                                         | 2 ml, 2 h 20 min                                                        |
| 23 | 400 mg, 2 h 45 min                                                      |                                                                         |

**Supplementary Table 2.** Medication effects.

| ROI                       | Measure | Estimates                                    | Statistics                          |
|---------------------------|---------|----------------------------------------------|-------------------------------------|
| Genu Corporis Callosi     | ADC     | M1 = -1.27, M2 = -3.35, 95% CI (-3.64, 7.79) | t(19) = 0.76, p = 0.792, d = 0.17   |
| Nucleus Lentiformis       | ADC     | M1 = 0.22, M2 = 1.01, 95% CI (-2.03, 0.45)   | t(13) = -1.38, p = 0.768, d = -0.37 |
| Splenium Corporis Callosi | ADC     | M1 = -5.58, M2 = -6.18, 95% CI (-4.14, 5.35) | t(18) = 0.27, p = 0.792, d = 0.06   |

|                           |                                    |                                                  |                                     |
|---------------------------|------------------------------------|--------------------------------------------------|-------------------------------------|
| White Matter              | ADC                                | M1 = 0.07, M2 = -0.35, 95% CI (-1.48, 2.32)      | t(16) = 0.47, p = 0.792, d = 0.11   |
| NA                        | AMS-C (t <sub>16</sub> )           | M1 = 1.11, M2 = 1.64, 95% CI (-1.19, 0.14)       | t(21) = -1.64, p = 0.116, d = -0.35 |
| Genu Corporis Callosi     | ATS                                | M1 = 2.59, M2 = 3.75, 95% CI (-4.68, 2.38)       | t(20) = -0.68, p = 0.672, d = -0.15 |
| Nucleus Lentiformis       | ATS                                | M1 = 5.74, M2 = 7.66, 95% CI (-5.94, 2.1)        | t(19) = -1, p = 0.66, d = -0.22     |
| Splenium Corporis Callosi | ATS                                | M1 = 4.74, M2 = 5.5, 95% CI (-6.03, 4.52)        | t(19) = -0.3, p = 0.768, d = -0.07  |
| White Matter              | ATS                                | M1 = 4.03, M2 = 6.09, 95% CI (-4.86, 0.74)       | t(20) = -1.53, p = 0.564, d = -0.33 |
| Genu Corporis Callosi     | CDO <sub>2</sub>                   | M1 = 15.81, M2 = -5.24, 95% CI (-8.68, 50.78)    | t(18) = 1.49, p = 0.308, d = 0.34   |
| Nucleus Lentiformis       | CDO <sub>2</sub>                   | M1 = -20.73, M2 = -31.4, 95% CI (-3.57, 24.91)   | t(19) = 1.57, p = 0.308, d = 0.35   |
| Splenium Corporis Callosi | CDO <sub>2</sub>                   | M1 = -3.36, M2 = -11.07, 95% CI (-14.64, 30.06)  | t(19) = 0.72, p = 0.479, d = 0.16   |
| White Matter              | CDO <sub>2</sub>                   | M1 = -14.25, M2 = -21.27, 95% CI (-4.95, 18.98)  | t(20) = 1.22, p = 0.313, d = 0.27   |
| Genu Corporis Callosi     | FAS                                | M1 = -4.54, M2 = -2.93, 95% CI (-13.61, 10.4)    | t(20) = -0.28, p = 0.783, d = -0.06 |
| Nucleus Lentiformis       | FAS                                | M1 = -3.79, M2 = -5.74, 95% CI (-1.84, 5.72)     | t(15) = 1.1, p = 0.684, d = 0.27    |
| Splenium Corporis Callosi | FAS                                | M1 = -4.98, M2 = -3.61, 95% CI (-8.91, 6.18)     | t(19) = -0.38, p = 0.783, d = -0.08 |
| White Matter              | FAS                                | M1 = -3.75, M2 = -6.35, 95% CI (-2.99, 8.2)      | t(19) = 0.97, p = 0.684, d = 0.22   |
| Genu Corporis Callosi     | K <sup>trans</sup>                 | M1 = -19.72, M2 = -15.65, 95% CI (-29.57, 21.44) | t(13) = -0.34, p = 0.736, d = -0.09 |
| Nucleus Lentiformis       | K <sup>trans</sup>                 | M1 = -6.95, M2 = 8.62, 95% CI (-48.92, 17.78)    | t(14) = -1, p = 0.445, d = -0.26    |
| Splenium Corporis Callosi | K <sup>trans</sup>                 | M1 = -4.64, M2 = 27.37, 95% CI (-85.63, 21.62)   | t(15) = -1.27, p = 0.445, d = -0.32 |
| White Matter              | K <sup>trans</sup>                 | M1 = 4.67, M2 = 26.74, 95% CI (-57.75, 13.6)     | t(15) = -1.32, p = 0.445, d = -0.33 |
| Genu Corporis Callosi     | K <sup>trans</sup> (Patlak)        | M1 = 13.2, M2 = 60.25, 95% CI (-135.66, 41.57)   | t(15) = -1.13, p = 0.994, d = -0.28 |
| Nucleus Lentiformis       | K <sup>trans</sup> (Patlak)        | M1 = 24.39, M2 = 14.3, 95% CI (-82.53, 102.7)    | t(14) = 0.23, p = 0.994, d = 0.06   |
| Splenium Corporis Callosi | K <sup>trans</sup> (Patlak)        | M1 = -3.45, M2 = 20.06, 95% CI (-99.06, 52.03)   | t(13) = -0.67, p = 0.994, d = -0.18 |
| White Matter              | K <sup>trans</sup> (Patlak)        | M1 = -11.54, M2 = -11.69, 95% CI (-40.59, 40.9)  | t(14) = 0.01, p = 0.994, d = 0      |
| NA                        | LL-score (t <sub>16</sub> )        | M1 = 5.64, M2 = 6.58, 95% CI (-2.74, 0.84)       | t(21) = -1.1, p = 0.284, d = -0.23  |
| Genu Corporis Callosi     | Perfusion                          | M1 = 44.33, M2 = 19.61, 95% CI (-9.19, 58.62)    | t(17) = 1.54, p = 0.568, d = 0.36   |
| Nucleus Lentiformis       | Perfusion                          | M1 = -2.36, M2 = -0.9, 95% CI (-22.94, 20.01)    | t(19) = -0.14, p = 0.888, d = -0.03 |
| Splenium Corporis Callosi | Perfusion                          | M1 = 19.85, M2 = 28.74, 95% CI (-36.82, 19.03)   | t(19) = -0.67, p = 0.684, d = -0.15 |
| White Matter              | Perfusion                          | M1 = 6.04, M2 = 12.94, 95% CI (-23.95, 10.15)    | t(20) = -0.84, p = 0.684, d = -0.18 |
| NA                        | pO <sub>2</sub> (t <sub>16</sub> ) | M1 = 36.7, M2 = 33.41, 95% CI (-0.4, 6.99)       | t(21) = 1.85, p = 0.078, d = 0.4    |
| Genu Corporis Callosi     | Volume                             | M1 = 1.9, M2 = 2, 95% CI (-2.37, 2.18)           | t(21) = -0.09, p = 0.931, d = -0.02 |
| Nucleus Lentiformis       | Volume                             | M1 = 0.3, M2 = 2.07, 95% CI (-3.75, 0.22)        | t(21) = -1.85, p = 0.195, d = -0.39 |
| Splenium Corporis Callosi | Volume                             | M1 = 1.14, M2 = 1.75, 95% CI (-3.93, 2.71)       | t(21) = -0.38, p = 0.882, d = -0.08 |
| Ventricles                | Volume                             | M1 = -10.7, M2 = -14.53, 95% CI (-2.52, 10.18)   | t(21) = 1.25, p = 0.372, d = 0.27   |
| White Matter              | Volume                             | M1 = 1.23, M2 = 2.54, 95% CI (-2.45, -0.18)      | t(21) = -2.42, p = 0.125, d = -0.52 |

Statistics indicate paired t-tests, *p*-values are two-sided and were corrected according to Benjamini and Hochberg's procedure.

### Supplementary Table 3. Hypoxia effects.

| ROI                       | Measure          | Estimates                           | Statistics                         |
|---------------------------|------------------|-------------------------------------|------------------------------------|
| Genu Corporis Callosi     | ADC              | M = -2.46, 95% CI (-5.24, 0.33)     | t(20) = -1.84, p = 0.108, d = -0.4 |
| Nucleus Lentiformis       | ADC              | M = 0.69, 95% CI (0.07, 1.31)       | t(14) = 2.38, p = 0.064, d = 0.61  |
| Splenium Corporis Callosi | ADC              | M = -5.91, 95% CI (-8.2, -3.62)     | t(19) = -5.4, p = 0, d = -1.21     |
| White Matter              | ADC              | M = -0.19, 95% CI (-1.09, 0.72)     | t(17) = -0.44, p = 0.667, d = -0.1 |
| Genu Corporis Callosi     | ATS              | M = 3.17, 95% CI (1.43, 4.91)       | t(21) = 3.8, p = 0.001, d = 0.81   |
| Nucleus Lentiformis       | ATS              | M = 6.66, 95% CI (4.66, 8.66)       | t(20) = 6.94, p = 0, d = 1.52      |
| Splenium Corporis Callosi | ATS              | M = 5.1, 95% CI (2.54, 7.67)        | t(20) = 4.15, p = 0, d = 0.91      |
| White Matter              | ATS              | M = 5.06, 95% CI (3.62, 6.5)        | t(21) = 7.31, p = 0, d = 1.56      |
| Genu Corporis Callosi     | CDO <sub>2</sub> | M = 5.29, 95% CI (-9.99, 20.56)     | t(19) = 0.72, p = 0.478, d = 0.16  |
| Nucleus Lentiformis       | CDO <sub>2</sub> | M = -26.83, 95% CI (-34.1, -19.55)  | t(20) = -7.69, p = 0, d = -1.68    |
| Splenium Corporis Callosi | CDO <sub>2</sub> | M = -7.4, 95% CI (-18.38, 3.59)     | t(20) = -1.4, p = 0.235, d = -0.31 |
| White Matter              | CDO <sub>2</sub> | M = -18.08, 95% CI (-24.09, -12.07) | t(21) = -6.26, p = 0, d = -1.33    |

|                           |                             |                                    |                                     |
|---------------------------|-----------------------------|------------------------------------|-------------------------------------|
| Genu Corporis Callosi     | FAS                         | M = -3.73, 95% CI (-9.58, 2.12)    | t(21) = -1.33, p = 0.199, d = -0.28 |
| Nucleus Lentiformis       | FAS                         | M = -4.82, 95% CI (-6.71, -2.93)   | t(16) = -5.42, p = 0, d = -1.31     |
| Splenium Corporis Callosi | FAS                         | M = -4.33, 95% CI (-8, -0.65)      | t(20) = -2.46, p = 0.031, d = -0.54 |
| White Matter              | FAS                         | M = -5.11, 95% CI (-7.89, -2.33)   | t(20) = -3.83, p = 0.002, d = -0.84 |
| Genu Corporis Callosi     | K <sup>trans</sup>          | M = -17.82, 95% CI (-30.05, -5.59) | t(14) = -3.13, p = 0.028, d = -0.81 |
| Nucleus Lentiformis       | K <sup>trans</sup>          | M = 0.83, 95% CI (-15.74, 17.41)   | t(15) = 0.11, p = 0.916, d = 0.03   |
| Splenium Corporis Callosi | K <sup>trans</sup>          | M = 12.31, 95% CI (-14.82, 39.44)  | t(16) = 0.96, p = 0.468, d = 0.23   |
| White Matter              | K <sup>trans</sup>          | M = 16.36, 95% CI (-1.76, 34.47)   | t(16) = 1.91, p = 0.148, d = 0.46   |
| Genu Corporis Callosi     | K <sup>trans</sup> (Patlak) | M = 38.11, 95% CI (-6.27, 82.48)   | t(16) = 1.82, p = 0.348, d = 0.44   |
| Nucleus Lentiformis       | K <sup>trans</sup> (Patlak) | M = 19.35, 95% CI (-25.2, 63.89)   | t(15) = 0.93, p = 0.492, d = 0.23   |
| Splenium Corporis Callosi | K <sup>trans</sup> (Patlak) | M = 7.52, 95% CI (-29.15, 44.2)    | t(14) = 0.44, p = 0.667, d = 0.11   |
| White Matter              | K <sup>trans</sup> (Patlak) | M = -11.62, 95% CI (-31.18, 7.94)  | t(15) = -1.27, p = 0.45, d = -0.32  |
| Genu Corporis Callosi     | Perfusion                   | M = 32.62, 95% CI (15.14, 50.1)    | t(18) = 3.92, p = 0.002, d = 0.9    |
| Nucleus Lentiformis       | Perfusion                   | M = -1.52, 95% CI (-11.85, 8.8)    | t(20) = -0.31, p = 0.761, d = -0.07 |
| Splenium Corporis Callosi | Perfusion                   | M = 24.51, 95% CI (10.8, 38.21)    | t(20) = 3.73, p = 0.002, d = 0.81   |
| White Matter              | Perfusion                   | M = 9.81, 95% CI (1.4, 18.21)      | t(21) = 2.43, p = 0.032, d = 0.52   |
| Genu Corporis Callosi     | Volume                      | M = 1.95, 95% CI (0.84, 3.06)      | t(22) = 3.65, p = 0.002, d = 0.76   |
| Nucleus Lentiformis       | Volume                      | M = 1.23, 95% CI (0.18, 2.27)      | t(22) = 2.44, p = 0.029, d = 0.51   |
| Splenium Corporis Callosi | Volume                      | M = 1.46, 95% CI (-0.17, 3.08)     | t(22) = 1.86, p = 0.076, d = 0.39   |
| Ventricles                | Volume                      | M = -12.7, 95% CI (-15.9, -9.49)   | t(22) = -8.22, p = 0, d = -1.71     |
| White Matter              | Volume                      | M = 1.91, 95% CI (1.29, 2.53)      | t(22) = 6.37, p = 0, d = 1.33       |

Statistics indicate paired t-tests, p-values are two-sided and were corrected according to Benjamini and Hochberg's procedure.

**Supplementary Table 4.** Inter-ROI correlations.

| ROI 1                     | ROI 2                     | Measure          | Statistics                                 |
|---------------------------|---------------------------|------------------|--------------------------------------------|
| Genu Corporis Callosi     | Nucleus Lentiformis       | ADC              | r = -0.19, 95% CI (-0.64, 0.36), p = 0.502 |
| Genu Corporis Callosi     | Splenium Corporis Callosi | ADC              | r = 0.43, 95% CI (-0.01, 0.74), p = 0.168  |
| Splenium Corporis Callosi | Nucleus Lentiformis       | ADC              | r = 0.27, 95% CI (-0.28, 0.69), p = 0.502  |
| White Matter              | Genu Corporis Callosi     | ADC              | r = 0.2, 95% CI (-0.3, 0.61), p = 0.502    |
| White Matter              | Nucleus Lentiformis       | ADC              | r = 0.52, 95% CI (0.01, 0.82), p = 0.168   |
| White Matter              | Splenium Corporis Callosi | ADC              | r = 0.23, 95% CI (-0.28, 0.64), p = 0.502  |
| Genu Corporis Callosi     | Nucleus Lentiformis       | ATS              | r = 0.56, 95% CI (0.17, 0.8), p = 0.016    |
| Genu Corporis Callosi     | Splenium Corporis Callosi | ATS              | r = 0.31, 95% CI (-0.14, 0.65), p = 0.177  |
| Splenium Corporis Callosi | Nucleus Lentiformis       | ATS              | r = 0.6, 95% CI (0.22, 0.82), p = 0.012    |
| White Matter              | Genu Corporis Callosi     | ATS              | r = 0.51, 95% CI (0.12, 0.77), p = 0.017   |
| White Matter              | Nucleus Lentiformis       | ATS              | r = 0.86, 95% CI (0.68, 0.94), p < 0.001   |
| White Matter              | Splenium Corporis Callosi | ATS              | r = 0.53, 95% CI (0.13, 0.78), p = 0.017   |
| Genu Corporis Callosi     | Nucleus Lentiformis       | CDO <sub>2</sub> | r = 0.49, 95% CI (0.05, 0.77), p = 0.038   |
| Genu Corporis Callosi     | Splenium Corporis Callosi | CDO <sub>2</sub> | r = 0.17, 95% CI (-0.3, 0.57), p = 0.486   |
| Splenium Corporis Callosi | Nucleus Lentiformis       | CDO <sub>2</sub> | r = 0.58, 95% CI (0.18, 0.81), p = 0.016   |
| White Matter              | Genu Corporis Callosi     | CDO <sub>2</sub> | r = 0.49, 95% CI (0.06, 0.77), p = 0.038   |
| White Matter              | Nucleus Lentiformis       | CDO <sub>2</sub> | r = 0.6, 95% CI (0.22, 0.82), p = 0.012    |
| White Matter              | Splenium Corporis Callosi | CDO <sub>2</sub> | r = 0.67, 95% CI (0.34, 0.86), p = 0.006   |
| Genu Corporis Callosi     | Nucleus Lentiformis       | FAS              | r = 0.28, 95% CI (-0.23, 0.67), p = 0.329  |
| Genu Corporis Callosi     | Splenium Corporis Callosi | FAS              | r = 0.37, 95% CI (-0.07, 0.69), p = 0.19   |
| Splenium Corporis Callosi | Nucleus Lentiformis       | FAS              | r = 0.13, 95% CI (-0.39, 0.59), p = 0.64   |
| White Matter              | Genu Corporis Callosi     | FAS              | r = 0.4, 95% CI (-0.04, 0.71), p = 0.19    |
| White Matter              | Nucleus Lentiformis       | FAS              | r = 0.38, 95% CI (-0.12, 0.73), p = 0.196  |
| White Matter              | Splenium Corporis Callosi | FAS              | r = 0.58, 95% CI (0.19, 0.82), p = 0.042   |

|                           |                           |             |                                                  |
|---------------------------|---------------------------|-------------|--------------------------------------------------|
| Genu Corporis Callosi     | Nucleus Lentiformis       | $K^{trans}$ | $r = 0.05$ , 95% CI (-0.48, 0.55), $p = 0.864$   |
| Genu Corporis Callosi     | Splenium Corporis Callosi | $K^{trans}$ | $r = 0.22$ , 95% CI (-0.33, 0.66), $p = 0.521$   |
| Splenium Corporis Callosi | Nucleus Lentiformis       | $K^{trans}$ | $r = 0.45$ , 95% CI (-0.06, 0.77), $p = 0.16$    |
| White Matter              | Genu Corporis Callosi     | $K^{trans}$ | $r = 0.24$ , 95% CI (-0.31, 0.67), $p = 0.521$   |
| White Matter              | Nucleus Lentiformis       | $K^{trans}$ | $r = 0.88$ , 95% CI (0.69, 0.96), $p < 0.001$    |
| White Matter              | Splenium Corporis Callosi | $K^{trans}$ | $r = 0.62$ , 95% CI (0.2, 0.85), $p = 0.024$     |
| Genu Corporis Callosi     | Nucleus Lentiformis       | Perfusion   | $r = 0.54$ , 95% CI (0.09, 0.8), $p = 0.033$     |
| Genu Corporis Callosi     | Splenium Corporis Callosi | Perfusion   | $r = 0.31$ , 95% CI (-0.17, 0.67), $p = 0.197$   |
| Splenium Corporis Callosi | Nucleus Lentiformis       | Perfusion   | $r = 0.43$ , 95% CI (-0.02, 0.73), $p = 0.073$   |
| White Matter              | Genu Corporis Callosi     | Perfusion   | $r = 0.6$ , 95% CI (0.21, 0.83), $p = 0.012$     |
| White Matter              | Nucleus Lentiformis       | Perfusion   | $r = 0.67$ , 95% CI (0.33, 0.85), $p = 0.006$    |
| White Matter              | Splenium Corporis Callosi | Perfusion   | $r = 0.6$ , 95% CI (0.22, 0.82), $p = 0.012$     |
| Genu Corporis Callosi     | Nucleus Lentiformis       | Volume      | $r = 0.3$ , 95% CI (-0.12, 0.64), $p = 0.298$    |
| Genu Corporis Callosi     | Splenium Corporis Callosi | Volume      | $r = 0.09$ , 95% CI (-0.33, 0.48), $p = 0.758$   |
| Genu Corporis Callosi     | Ventricles                | Volume      | $r = -0.3$ , 95% CI (-0.63, 0.13), $p = 0.298$   |
| Nucleus Lentiformis       | Ventricles                | Volume      | $r = -0.6$ , 95% CI (-0.81, -0.25), $p = 0.03$   |
| Splenium Corporis Callosi | Nucleus Lentiformis       | Volume      | $r = -0.23$ , 95% CI (-0.59, 0.2), $p = 0.416$   |
| Splenium Corporis Callosi | Ventricles                | Volume      | $r = -0.03$ , 95% CI (-0.44, 0.39), $p = 0.888$  |
| White Matter              | Genu Corporis Callosi     | Volume      | $r = 0.1$ , 95% CI (-0.32, 0.49), $p = 0.758$    |
| White Matter              | Nucleus Lentiformis       | Volume      | $r = 0.31$ , 95% CI (-0.12, 0.64), $p = 0.298$   |
| White Matter              | Splenium Corporis Callosi | Volume      | $r = 0.29$ , 95% CI (-0.14, 0.63), $p = 0.298$   |
| White Matter              | Ventricles                | Volume      | $r = -0.45$ , 95% CI (-0.73, -0.05), $p = 0.145$ |

Statistics indicate Pearson correlations, p-values are two-sided and were corrected according to Benjamini and Hochberg's procedure.

**Supplementary Table 5.** Intra-ROI correlations between measures.

| ROI                       | Measure 1 | Measure 2             | Statistics                                        |
|---------------------------|-----------|-----------------------|---------------------------------------------------|
| Genu Corporis Callosi     | ADC       | AMS-C ( $t_{16}$ )    | $r = -0.28$ , 95% CI (1.29, 2.53), $p = 0.432$    |
| Nucleus Lentiformis       | ADC       | AMS-C ( $t_{16}$ )    | $r = 0.39$ , 95% CI (15.14, 50.1), $p = 0.432$    |
| Splenium Corporis Callosi | ADC       | AMS-C ( $t_{16}$ )    | $r = -0.01$ , 95% CI (-11.85, 8.8), $p = 0.973$   |
| White Matter              | ADC       | AMS-C ( $t_{16}$ )    | $r = -0.19$ , 95% CI (10.8, 38.21), $p = 0.608$   |
| Genu Corporis Callosi     | ADC       | ATS                   | $r = -0.37$ , 95% CI (1.43, 4.91), $p = 0.428$    |
| Nucleus Lentiformis       | ADC       | ATS                   | $r = -0.14$ , 95% CI (4.66, 8.66), $p = 0.961$    |
| Splenium Corporis Callosi | ADC       | ATS                   | $r = -0.03$ , 95% CI (2.54, 7.67), $p = 0.961$    |
| White Matter              | ADC       | ATS                   | $r = 0.01$ , 95% CI (3.62, 6.5), $p = 0.961$      |
| Genu Corporis Callosi     | ADC       | CDO <sub>2</sub>      | $r = -0.03$ , 95% CI (-9.99, 20.56), $p = 0.982$  |
| Nucleus Lentiformis       | ADC       | CDO <sub>2</sub>      | $r = -0.01$ , 95% CI (-34.1, -19.55), $p = 0.982$ |
| Splenium Corporis Callosi | ADC       | CDO <sub>2</sub>      | $r = -0.18$ , 95% CI (-18.38, 3.59), $p = 0.982$  |
| White Matter              | ADC       | CDO <sub>2</sub>      | $r = 0.09$ , 95% CI (-24.09, -12.07), $p = 0.982$ |
| Genu Corporis Callosi     | ADC       | FAS                   | $r = 0.45$ , 95% CI (-9.58, 2.12), $p = 0.192$    |
| Nucleus Lentiformis       | ADC       | FAS                   | $r = -0.05$ , 95% CI (-6.71, -2.93), $p = 0.973$  |
| Splenium Corporis Callosi | ADC       | FAS                   | $r = -0.2$ , 95% CI (-8, -0.65), $p = 0.83$       |
| White Matter              | ADC       | FAS                   | $r = 0.01$ , 95% CI (-7.89, -2.33), $p = 0.973$   |
| Genu Corporis Callosi     | ADC       | $K^{trans}$           | $r = 0.64$ , 95% CI (-30.05, -5.59), $p = 0.076$  |
| Nucleus Lentiformis       | ADC       | $K^{trans}$           | $r = 0.62$ , 95% CI (-15.74, 17.41), $p = 0.084$  |
| Splenium Corporis Callosi | ADC       | $K^{trans}$           | $r = -0.24$ , 95% CI (-14.82, 39.44), $p = 0.531$ |
| White Matter              | ADC       | $K^{trans}$           | $r = -0.02$ , 95% CI (-1.76, 34.47), $p = 0.936$  |
| Genu Corporis Callosi     | ADC       | LL-score ( $t_{16}$ ) | $r = -0.29$ , 95% CI (0.84, 3.06), $p = 0.408$    |
| Nucleus Lentiformis       | ADC       | LL-score ( $t_{16}$ ) | $r = 0.28$ , 95% CI (0.18, 2.27), $p = 0.408$     |

|                           |                    |                       |                                                   |
|---------------------------|--------------------|-----------------------|---------------------------------------------------|
| Splenium Corporis Callosi | ADC                | LL-score ( $t_{16}$ ) | $r = 0.06$ , 95% CI (-0.17, 3.08), $p = 0.797$    |
| White Matter              | ADC                | LL-score ( $t_{16}$ ) | $r = -0.28$ , 95% CI (-15.9, -9.49), $p = 0.408$  |
| Genu Corporis Callosi     | ADC                | pO2 ( $t_{16}$ )      | $r = 0.22$ , 95% CI (1.4, 18.21), $p = 0.601$     |
| Nucleus Lentiformis       | ADC                | pO2 ( $t_{16}$ )      | $r = -0.54$ , 95% CI (-5.24, 0.33), $p = 0.156$   |
| Splenium Corporis Callosi | ADC                | pO2 ( $t_{16}$ )      | $r = -0.02$ , 95% CI (0.07, 1.31), $p = 0.938$    |
| White Matter              | ADC                | pO2 ( $t_{16}$ )      | $r = -0.19$ , 95% CI (-8.2, -3.62), $p = 0.601$   |
| NA                        | AMS-C ( $t_{16}$ ) | pO2 ( $t_{16}$ )      | $r = -0.54$ , 95% CI (10.8, 38.21), $p = 0.007$   |
| Genu Corporis Callosi     | ATS                | AMS-C ( $t_{16}$ )    | $r = 0.1$ , 95% CI (-24.09, -12.07), $p = 0.838$  |
| Nucleus Lentiformis       | ATS                | AMS-C ( $t_{16}$ )    | $r = -0.09$ , 95% CI (0.84, 3.06), $p = 0.838$    |
| Splenium Corporis Callosi | ATS                | AMS-C ( $t_{16}$ )    | $r = 0.05$ , 95% CI (0.18, 2.27), $p = 0.838$     |
| White Matter              | ATS                | AMS-C ( $t_{16}$ )    | $r = 0.25$ , 95% CI (-0.17, 3.08), $p = 0.838$    |
| Genu Corporis Callosi     | ATS                | CDO <sub>2</sub>      | $r = -0.28$ , 95% CI (-7.89, -2.33), $p = 0.445$  |
| Nucleus Lentiformis       | ATS                | CDO <sub>2</sub>      | $r = 0.27$ , 95% CI (-30.05, -5.59), $p = 0.445$  |
| Splenium Corporis Callosi | ATS                | CDO <sub>2</sub>      | $r = 0.23$ , 95% CI (-15.74, 17.41), $p = 0.445$  |
| White Matter              | ATS                | CDO <sub>2</sub>      | $r = -0.06$ , 95% CI (-14.82, 39.44), $p = 0.812$ |
| Genu Corporis Callosi     | ATS                | FAS                   | $r = 0.16$ , 95% CI (-1.09, 0.72), $p = 0.63$     |
| Nucleus Lentiformis       | ATS                | FAS                   | $r = 0.13$ , 95% CI (1.43, 4.91), $p = 0.63$      |
| Splenium Corporis Callosi | ATS                | FAS                   | $r = -0.18$ , 95% CI (4.66, 8.66), $p = 0.63$     |
| White Matter              | ATS                | FAS                   | $r = -0.4$ , 95% CI (2.54, 7.67), $p = 0.284$     |
| Genu Corporis Callosi     | ATS                | K <sup>trans</sup>    | $r = -0.62$ , 95% CI (3.62, 6.5), $p = 0.038$     |
| Nucleus Lentiformis       | ATS                | K <sup>trans</sup>    | $r = 0.5$ , 95% CI (-9.58, 2.12), $p = 0.093$     |
| Splenium Corporis Callosi | ATS                | K <sup>trans</sup>    | $r = 0.24$ , 95% CI (-6.71, -2.93), $p = 0.391$   |
| White Matter              | ATS                | K <sup>trans</sup>    | $r = 0.7$ , 95% CI (-8, -0.65), $p = 0.012$       |
| Genu Corporis Callosi     | ATS                | LL-score ( $t_{16}$ ) | $r = 0.11$ , 95% CI (-1.76, 34.47), $p = 0.999$   |
| Nucleus Lentiformis       | ATS                | LL-score ( $t_{16}$ ) | $r = -0.16$ , 95% CI (-9.99, 20.56), $p = 0.999$  |
| Splenium Corporis Callosi | ATS                | LL-score ( $t_{16}$ ) | $r = -0.04$ , 95% CI (-34.1, -19.55), $p = 0.999$ |
| White Matter              | ATS                | LL-score ( $t_{16}$ ) | $r = 0$ , 95% CI (-18.38, 3.59), $p = 0.999$      |
| Genu Corporis Callosi     | ATS                | pO2 ( $t_{16}$ )      | $r = -0.24$ , 95% CI (-15.9, -9.49), $p = 0.38$   |
| Nucleus Lentiformis       | ATS                | pO2 ( $t_{16}$ )      | $r = -0.38$ , 95% CI (1.29, 2.53), $p = 0.182$    |
| Splenium Corporis Callosi | ATS                | pO2 ( $t_{16}$ )      | $r = -0.12$ , 95% CI (15.14, 50.1), $p = 0.597$   |
| White Matter              | ATS                | pO2 ( $t_{16}$ )      | $r = -0.47$ , 95% CI (-11.85, 8.8), $p = 0.104$   |
| Genu Corporis Callosi     | CDO <sub>2</sub>   | AMS-C ( $t_{16}$ )    | $r = 0.2$ , 95% CI (-6.71, -2.93), $p = 0.399$    |
| Nucleus Lentiformis       | CDO <sub>2</sub>   | AMS-C ( $t_{16}$ )    | $r = -0.29$ , 95% CI (-8, -0.65), $p = 0.272$     |
| Splenium Corporis Callosi | CDO <sub>2</sub>   | AMS-C ( $t_{16}$ )    | $r = -0.34$ , 95% CI (-7.89, -2.33), $p = 0.256$  |
| White Matter              | CDO <sub>2</sub>   | AMS-C ( $t_{16}$ )    | $r = -0.43$ , 95% CI (-30.05, -5.59), $p = 0.184$ |
| Genu Corporis Callosi     | CDO <sub>2</sub>   | LL-score ( $t_{16}$ ) | $r = 0.09$ , 95% CI (4.66, 8.66), $p = 0.716$     |
| Nucleus Lentiformis       | CDO <sub>2</sub>   | LL-score ( $t_{16}$ ) | $r = -0.41$ , 95% CI (2.54, 7.67), $p = 0.18$     |
| Splenium Corporis Callosi | CDO <sub>2</sub>   | LL-score ( $t_{16}$ ) | $r = -0.23$ , 95% CI (3.62, 6.5), $p = 0.427$     |
| White Matter              | CDO <sub>2</sub>   | LL-score ( $t_{16}$ ) | $r = -0.37$ , 95% CI (-9.58, 2.12), $p = 0.18$    |
| Genu Corporis Callosi     | CDO <sub>2</sub>   | pO2 ( $t_{16}$ )      | $r = -0.01$ , 95% CI (-15.74, 17.41), $p = 0.95$  |
| Nucleus Lentiformis       | CDO <sub>2</sub>   | pO2 ( $t_{16}$ )      | $r = 0.42$ , 95% CI (-14.82, 39.44), $p = 0.073$  |
| Splenium Corporis Callosi | CDO <sub>2</sub>   | pO2 ( $t_{16}$ )      | $r = 0.43$ , 95% CI (-1.76, 34.47), $p = 0.073$   |
| White Matter              | CDO <sub>2</sub>   | pO2 ( $t_{16}$ )      | $r = 0.44$ , 95% CI (-9.99, 20.56), $p = 0.073$   |
| Genu Corporis Callosi     | FAS                | AMS-C ( $t_{16}$ )    | $r = -0.17$ , 95% CI (-8, -0.65), $p = 0.885$     |
| Nucleus Lentiformis       | FAS                | AMS-C ( $t_{16}$ )    | $r = -0.11$ , 95% CI (-7.89, -2.33), $p = 0.885$  |
| Splenium Corporis Callosi | FAS                | AMS-C ( $t_{16}$ )    | $r = 0.03$ , 95% CI (-30.05, -5.59), $p = 0.895$  |
| White Matter              | FAS                | AMS-C ( $t_{16}$ )    | $r = -0.46$ , 95% CI (-15.74, 17.41), $p = 0.148$ |
| Genu Corporis Callosi     | FAS                | CDO <sub>2</sub>      | $r = -0.03$ , 95% CI (-8.2, -3.62), $p = 0.904$   |
| Nucleus Lentiformis       | FAS                | CDO <sub>2</sub>      | $r = -0.08$ , 95% CI (-1.09, 0.72), $p = 0.904$   |
| Splenium Corporis Callosi | FAS                | CDO <sub>2</sub>      | $r = 0.14$ , 95% CI (1.43, 4.91), $p = 0.904$     |

|                           |                             |                                    |                                              |
|---------------------------|-----------------------------|------------------------------------|----------------------------------------------|
| White Matter              | FAS                         | CDO <sub>2</sub>                   | r = 0.22, 95% CI (4.66, 8.66), p = 0.904     |
| Genu Corporis Callosi     | FAS                         | K <sup>trans</sup>                 | r = 0.16, 95% CI (10.8, 38.21), p = 0.592    |
| Nucleus Lentiformis       | FAS                         | K <sup>trans</sup>                 | r = 0.31, 95% CI (1.4, 18.21), p = 0.504     |
| Splenium Corporis Callosi | FAS                         | K <sup>trans</sup>                 | r = -0.35, 95% CI (-5.24, 0.33), p = 0.504   |
| White Matter              | FAS                         | K <sup>trans</sup>                 | r = -0.25, 95% CI (0.07, 1.31), p = 0.504    |
| Genu Corporis Callosi     | FAS                         | LL-score (t <sub>16</sub> )        | r = -0.25, 95% CI (2.54, 7.67), p = 0.536    |
| Nucleus Lentiformis       | FAS                         | LL-score (t <sub>16</sub> )        | r = -0.14, 95% CI (3.62, 6.5), p = 0.807     |
| Splenium Corporis Callosi | FAS                         | LL-score (t <sub>16</sub> )        | r = 0.03, 95% CI (-9.58, 2.12), p = 0.898    |
| White Matter              | FAS                         | LL-score (t <sub>16</sub> )        | r = -0.47, 95% CI (-6.71, -2.93), p = 0.132  |
| Genu Corporis Callosi     | FAS                         | pO <sub>2</sub> (t <sub>16</sub> ) | r = -0.05, 95% CI (-14.82, 39.44), p = 0.831 |
| Nucleus Lentiformis       | FAS                         | pO <sub>2</sub> (t <sub>16</sub> ) | r = 0.14, 95% CI (-1.76, 34.47), p = 0.792   |
| Splenium Corporis Callosi | FAS                         | pO <sub>2</sub> (t <sub>16</sub> ) | r = 0.16, 95% CI (-9.99, 20.56), p = 0.792   |
| White Matter              | FAS                         | pO <sub>2</sub> (t <sub>16</sub> ) | r = 0.46, 95% CI (-34.1, -19.55), p = 0.136  |
| Genu Corporis Callosi     | K <sup>trans</sup>          | AMS-C (t <sub>16</sub> )           | r = -0.33, 95% CI (-11.85, 8.8), p = 0.674   |
| Nucleus Lentiformis       | K <sup>trans</sup>          | AMS-C (t <sub>16</sub> )           | r = 0.14, 95% CI (10.8, 38.21), p = 0.793    |
| Splenium Corporis Callosi | K <sup>trans</sup>          | AMS-C (t <sub>16</sub> )           | r = -0.25, 95% CI (1.4, 18.21), p = 0.674    |
| White Matter              | K <sup>trans</sup>          | AMS-C (t <sub>16</sub> )           | r = -0.04, 95% CI (-5.24, 0.33), p = 0.891   |
| Genu Corporis Callosi     | K <sup>trans</sup>          | CDO <sub>2</sub>                   | r = -0.33, 95% CI (-18.38, 3.59), p = 0.499  |
| Nucleus Lentiformis       | K <sup>trans</sup>          | CDO <sub>2</sub>                   | r = 0.25, 95% CI (-24.09, -12.07), p = 0.499 |
| Splenium Corporis Callosi | K <sup>trans</sup>          | CDO <sub>2</sub>                   | r = 0.24, 95% CI (0.84, 3.06), p = 0.499     |
| White Matter              | K <sup>trans</sup>          | CDO <sub>2</sub>                   | r = 0.17, 95% CI (0.18, 2.27), p = 0.506     |
| Genu Corporis Callosi     | K <sup>trans</sup>          | LL-score (t <sub>16</sub> )        | r = -0.31, 95% CI (-0.17, 3.08), p = 0.53    |
| Nucleus Lentiformis       | K <sup>trans</sup>          | LL-score (t <sub>16</sub> )        | r = 0.01, 95% CI (-15.9, -9.49), p = 0.969   |
| Splenium Corporis Callosi | K <sup>trans</sup>          | LL-score (t <sub>16</sub> )        | r = -0.32, 95% CI (1.29, 2.53), p = 0.53     |
| White Matter              | K <sup>trans</sup>          | LL-score (t <sub>16</sub> )        | r = -0.21, 95% CI (15.14, 50.1), p = 0.555   |
| Genu Corporis Callosi     | K <sup>trans</sup>          | pO <sub>2</sub> (t <sub>16</sub> ) | r = 0.27, 95% CI (0.07, 1.31), p = 0.565     |
| Nucleus Lentiformis       | K <sup>trans</sup>          | pO <sub>2</sub> (t <sub>16</sub> ) | r = -0.16, 95% CI (-8.2, -3.62), p = 0.565   |
| Splenium Corporis Callosi | K <sup>trans</sup>          | pO <sub>2</sub> (t <sub>16</sub> ) | r = 0.19, 95% CI (-1.09, 0.72), p = 0.565    |
| White Matter              | K <sup>trans</sup>          | pO <sub>2</sub> (t <sub>16</sub> ) | r = -0.27, 95% CI (1.43, 4.91), p = 0.565    |
| NA                        | LL-score (t <sub>16</sub> ) | AMS-C (t <sub>16</sub> )           | r = 0.84, 95% CI (-34.1, -19.55), p = 0      |
| NA                        | LL-score (t <sub>16</sub> ) | pO <sub>2</sub> (t <sub>16</sub> ) | r = -0.39, 95% CI (-0.17, 3.08), p = 0.066   |
| Genu Corporis Callosi     | Perfusion                   | ADC                                | r = 0.08, 95% CI (0.07, 1.31), p = 0.746     |
| Nucleus Lentiformis       | Perfusion                   | ADC                                | r = 0.43, 95% CI (-8.2, -3.62), p = 0.572    |
| Splenium Corporis Callosi | Perfusion                   | ADC                                | r = -0.16, 95% CI (-1.09, 0.72), p = 0.746   |
| White Matter              | Perfusion                   | ADC                                | r = 0.15, 95% CI (1.43, 4.91), p = 0.746     |
| Genu Corporis Callosi     | Perfusion                   | AMS-C (t <sub>16</sub> )           | r = -0.01, 95% CI (15.14, 50.1), p = 0.964   |
| Nucleus Lentiformis       | Perfusion                   | AMS-C (t <sub>16</sub> )           | r = 0.19, 95% CI (-11.85, 8.8), p = 0.964    |
| Splenium Corporis Callosi | Perfusion                   | AMS-C (t <sub>16</sub> )           | r = -0.05, 95% CI (10.8, 38.21), p = 0.964   |
| White Matter              | Perfusion                   | AMS-C (t <sub>16</sub> )           | r = 0.1, 95% CI (1.4, 18.21), p = 0.964      |
| Genu Corporis Callosi     | Perfusion                   | ATS                                | r = -0.14, 95% CI (4.66, 8.66), p = 0.59     |
| Nucleus Lentiformis       | Perfusion                   | ATS                                | r = 0.62, 95% CI (2.54, 7.67), p = 0.012     |
| Splenium Corporis Callosi | Perfusion                   | ATS                                | r = 0.3, 95% CI (3.62, 6.5), p = 0.276       |
| White Matter              | Perfusion                   | ATS                                | r = 0.58, 95% CI (-9.58, 2.12), p = 0.012    |
| Genu Corporis Callosi     | Perfusion                   | CDO <sub>2</sub>                   | r = 0.91, 95% CI (-34.1, -19.55), p = 0      |
| Nucleus Lentiformis       | Perfusion                   | CDO <sub>2</sub>                   | r = 0.7, 95% CI (-18.38, 3.59), p = 0        |
| Splenium Corporis Callosi | Perfusion                   | CDO <sub>2</sub>                   | r = 0.84, 95% CI (-24.09, -12.07), p = 0     |
| White Matter              | Perfusion                   | CDO <sub>2</sub>                   | r = 0.57, 95% CI (0.84, 3.06), p = 0.006     |
| Genu Corporis Callosi     | Perfusion                   | FAS                                | r = 0, 95% CI (-6.71, -2.93), p = 0.995      |
| Nucleus Lentiformis       | Perfusion                   | FAS                                | r = -0.04, 95% CI (-8, -0.65), p = 0.995     |
| Splenium Corporis Callosi | Perfusion                   | FAS                                | r = 0.08, 95% CI (-7.89, -2.33), p = 0.995   |

|                           |           |                       |                                                           |
|---------------------------|-----------|-----------------------|-----------------------------------------------------------|
| White Matter              | Perfusion | FAS                   | $r = -0.36, 95\% \text{ CI } (-30.05, -5.59), p = 0.456$  |
| Genu Corporis Callosi     | Perfusion | $K^{\text{trans}}$    | $r = -0.22, 95\% \text{ CI } (-15.74, 17.41), p = 0.499$  |
| Nucleus Lentiformis       | Perfusion | $K^{\text{trans}}$    | $r = 0.56, 95\% \text{ CI } (-14.82, 39.44), p = 0.056$   |
| Splenium Corporis Callosi | Perfusion | $K^{\text{trans}}$    | $r = 0.3, 95\% \text{ CI } (-1.76, 34.47), p = 0.348$     |
| White Matter              | Perfusion | $K^{\text{trans}}$    | $r = 0.64, 95\% \text{ CI } (-9.99, 20.56), p = 0.024$    |
| Genu Corporis Callosi     | Perfusion | LL-score ( $t_{16}$ ) | $r = 0.03, 95\% \text{ CI } (0.18, 2.27), p = 0.97$       |
| Nucleus Lentiformis       | Perfusion | LL-score ( $t_{16}$ ) | $r = -0.04, 95\% \text{ CI } (-0.17, 3.08), p = 0.97$     |
| Splenium Corporis Callosi | Perfusion | LL-score ( $t_{16}$ ) | $r = -0.01, 95\% \text{ CI } (-15.9, -9.49), p = 0.97$    |
| White Matter              | Perfusion | LL-score ( $t_{16}$ ) | $r = 0.02, 95\% \text{ CI } (1.29, 2.53), p = 0.97$       |
| Genu Corporis Callosi     | Perfusion | pO2 ( $t_{16}$ )      | $r = 0.07, 95\% \text{ CI } (-5.24, 0.33), p = 0.779$     |
| Nucleus Lentiformis       | Perfusion | pO2 ( $t_{16}$ )      | $r = -0.28, 95\% \text{ CI } (0.07, 1.31), p = 0.444$     |
| Splenium Corporis Callosi | Perfusion | pO2 ( $t_{16}$ )      | $r = -0.08, 95\% \text{ CI } (-8.2, -3.62), p = 0.779$    |
| White Matter              | Perfusion | pO2 ( $t_{16}$ )      | $r = -0.39, 95\% \text{ CI } (-1.09, 0.72), p = 0.284$    |
| Genu Corporis Callosi     | Volume    | ADC                   | $r = -0.39, 95\% \text{ CI } (1.29, 2.53), p = 0.226$     |
| Nucleus Lentiformis       | Volume    | ADC                   | $r = 0.43, 95\% \text{ CI } (15.14, 50.1), p = 0.226$     |
| Splenium Corporis Callosi | Volume    | ADC                   | $r = -0.17, 95\% \text{ CI } (-11.85, 8.8), p = 0.637$    |
| White Matter              | Volume    | ADC                   | $r = 0.07, 95\% \text{ CI } (10.8, 38.21), p = 0.793$     |
| Genu Corporis Callosi     | Volume    | AMS-C ( $t_{16}$ )    | $r = 0.42, 95\% \text{ CI } (0.84, 3.06), p = 0.22$       |
| Nucleus Lentiformis       | Volume    | AMS-C ( $t_{16}$ )    | $r = 0.19, 95\% \text{ CI } (0.18, 2.27), p = 0.599$      |
| Splenium Corporis Callosi | Volume    | AMS-C ( $t_{16}$ )    | $r = 0.13, 95\% \text{ CI } (-0.17, 3.08), p = 0.599$     |
| Ventricles                | Volume    | AMS-C ( $t_{16}$ )    | $r = -0.25, 95\% \text{ CI } (-15.9, -9.49), p = 0.599$   |
| White Matter              | Volume    | AMS-C ( $t_{16}$ )    | $r = 0.12, 95\% \text{ CI } (1.29, 2.53), p = 0.599$      |
| Genu Corporis Callosi     | Volume    | ATS                   | $r = 0.22, 95\% \text{ CI } (1.4, 18.21), p = 0.335$      |
| Nucleus Lentiformis       | Volume    | ATS                   | $r = 0.59, 95\% \text{ CI } (-5.24, 0.33), p = 0.02$      |
| Splenium Corporis Callosi | Volume    | ATS                   | $r = -0.48, 95\% \text{ CI } (0.07, 1.31), p = 0.054$     |
| White Matter              | Volume    | ATS                   | $r = 0.37, 95\% \text{ CI } (-8.2, -3.62), p = 0.119$     |
| Genu Corporis Callosi     | Volume    | CDO <sub>2</sub>      | $r = 0.23, 95\% \text{ CI } (-7.89, -2.33), p = 0.74$     |
| Nucleus Lentiformis       | Volume    | CDO <sub>2</sub>      | $r = -0.07, 95\% \text{ CI } (-30.05, -5.59), p = 0.75$   |
| Splenium Corporis Callosi | Volume    | CDO <sub>2</sub>      | $r = -0.14, 95\% \text{ CI } (-15.74, 17.41), p = 0.74$   |
| White Matter              | Volume    | CDO <sub>2</sub>      | $r = 0.17, 95\% \text{ CI } (-14.82, 39.44), p = 0.74$    |
| Genu Corporis Callosi     | Volume    | FAS                   | $r = -0.1, 95\% \text{ CI } (-1.09, 0.72), p = 0.912$     |
| Nucleus Lentiformis       | Volume    | FAS                   | $r = 0, 95\% \text{ CI } (1.43, 4.91), p = 0.996$         |
| Splenium Corporis Callosi | Volume    | FAS                   | $r = -0.17, 95\% \text{ CI } (4.66, 8.66), p = 0.912$     |
| White Matter              | Volume    | FAS                   | $r = -0.09, 95\% \text{ CI } (2.54, 7.67), p = 0.912$     |
| Genu Corporis Callosi     | Volume    | $K^{\text{trans}}$    | $r = -0.17, 95\% \text{ CI } (3.62, 6.5), p = 0.575$      |
| Nucleus Lentiformis       | Volume    | $K^{\text{trans}}$    | $r = 0.52, 95\% \text{ CI } (-9.58, 2.12), p = 0.152$     |
| Splenium Corporis Callosi | Volume    | $K^{\text{trans}}$    | $r = 0.15, 95\% \text{ CI } (-6.71, -2.93), p = 0.575$    |
| White Matter              | Volume    | $K^{\text{trans}}$    | $r = 0.33, 95\% \text{ CI } (-8, -0.65), p = 0.386$       |
| Genu Corporis Callosi     | Volume    | LL-score ( $t_{16}$ ) | $r = 0.52, 95\% \text{ CI } (-1.76, 34.47), p = 0.055$    |
| Nucleus Lentiformis       | Volume    | LL-score ( $t_{16}$ ) | $r = -0.06, 95\% \text{ CI } (-9.99, 20.56), p = 0.985$   |
| Splenium Corporis Callosi | Volume    | LL-score ( $t_{16}$ ) | $r = 0.23, 95\% \text{ CI } (-34.1, -19.55), p = 0.72$    |
| Ventricles                | Volume    | LL-score ( $t_{16}$ ) | $r = 0, 95\% \text{ CI } (-18.38, 3.59), p = 0.989$       |
| White Matter              | Volume    | LL-score ( $t_{16}$ ) | $r = -0.14, 95\% \text{ CI } (-24.09, -12.07), p = 0.853$ |
| Genu Corporis Callosi     | Volume    | Perfusion             | $r = 0.25, 95\% \text{ CI } (0.84, 3.06), p = 0.412$      |
| Nucleus Lentiformis       | Volume    | Perfusion             | $r = 0.35, 95\% \text{ CI } (0.18, 2.27), p = 0.23$       |
| Splenium Corporis Callosi | Volume    | Perfusion             | $r = -0.06, 95\% \text{ CI } (-0.17, 3.08), p = 0.781$    |
| White Matter              | Volume    | Perfusion             | $r = 0.45, 95\% \text{ CI } (-15.9, -9.49), p = 0.148$    |
| Genu Corporis Callosi     | Volume    | pO2 ( $t_{16}$ )      | $r = -0.51, 95\% \text{ CI } (15.14, 50.1), p = 0.02$     |
| Nucleus Lentiformis       | Volume    | pO2 ( $t_{16}$ )      | $r = -0.56, 95\% \text{ CI } (-11.85, 8.8), p = 0.015$    |
| Splenium Corporis Callosi | Volume    | pO2 ( $t_{16}$ )      | $r = -0.14, 95\% \text{ CI } (10.8, 38.21), p = 0.536$    |



|              |        |                        |                                           |
|--------------|--------|------------------------|-------------------------------------------|
| Ventricles   | Volume | pO2 (t <sub>16</sub> ) | r = 0.57, 95% CI (1.4, 18.21), p = 0.015  |
| White Matter | Volume | pO2 (t <sub>16</sub> ) | r = -0.2, 95% CI (-5.24, 0.33), p = 0.439 |

Statistics indicate Pearson correlations, p-values are two-sided and were corrected according to Benjamini and Hochberg's procedure.

**Supplementary Table 6.** MR Sequence details.

|                                   | Morpho-<br>metry                   | Sodium mapping                      |                                     | Transfer<br>constant $K^{trans}$   | Diffusion<br>imaging                          | Perfusion<br>imaging               |
|-----------------------------------|------------------------------------|-------------------------------------|-------------------------------------|------------------------------------|-----------------------------------------------|------------------------------------|
|                                   |                                    | ATS                                 | FAS                                 |                                    |                                               |                                    |
| Spatial resolution                | 1,0 x 1,0 x 1,0<br>mm <sup>3</sup> | 4,5 x 4,5 x 4,5<br>mm <sup>3*</sup> | 5,5 x 5,5 x 5,5<br>mm <sup>3*</sup> | 0,9 x 0,9 x 5,0<br>mm <sup>3</sup> | 1,6 x 1,6 x 3,0<br>mm <sup>3</sup>            | 3,6 x 3,6 x 3,6<br>mm <sup>3</sup> |
| Repetition time (TR)              | 1570 ms                            | 160 ms                              | 124 ms                              | 5,28 ms                            | 5100 ms                                       | 2500 ms                            |
| Echo time (TE)                    | 2,63 ms                            | 0,3 ms                              | 0,3 ms                              | 2,45 ms                            | 72,8 ms                                       | 9,9 ms                             |
| Inversion time (TI <sub>1</sub> ) | 900 ms                             |                                     | 0,34 ms                             |                                    |                                               | 700 ms                             |
| Inversion time (TI <sub>2</sub> ) |                                    |                                     |                                     |                                    |                                               | 1800 ms                            |
| Acquisition time (TA)             | 4 min 8 s                          | 10 min 40s                          | 8 min 16 s                          | 8 min 0 s                          | 1 min 22 s                                    | 2 min 47 s                         |
| Projections                       |                                    | 4000                                | 4000                                |                                    |                                               |                                    |
| Readout time (T <sub>RO</sub> )   |                                    | 20 ms                               | 10 ms                               |                                    |                                               |                                    |
| Temporal resolution               |                                    |                                     |                                     | 11,8 s                             |                                               |                                    |
| B-values                          |                                    |                                     |                                     |                                    | 0 s/mm <sup>2</sup><br>1000 s/mm <sup>2</sup> |                                    |
| Diffusion directions              |                                    |                                     |                                     |                                    | 12                                            |                                    |
| Tagged-control pairs              |                                    |                                     |                                     |                                    |                                               | 30                                 |

\* nominal spatial resolution

## Supplementary References

1. Reuter M, Rosas HD, Fischl B. Highly Accurate Inverse Consistent Registration: A Robust Approach. *NeuroImage* **53**, 1181--1196 (2010).
2. Segonne F, *et al.* A hybrid approach to the skull stripping problem in MRI. *NeuroImage* **22**, 1060-1075 (2004).
3. Fischl B, *et al.* Whole brain segmentation: automated labeling of neuroanatomical structures in the human brain. *Neuron* **33**, 341-355 (2002).
4. Fischl B, *et al.* Sequence-independent segmentation of magnetic resonance images. *NeuroImage* **23**, S69-S84 (2004).
5. Sled JG, Zijdenbos AP, Evans AC. A nonparametric method for automatic correction of intensity nonuniformity in MRI data. *IEEE Trans Med Imaging* **17**, 87-97 (1998).
6. Fischl B, Liu A, Dale AM. Automated manifold surgery: constructing geometrically accurate

and topologically correct models of the human cerebral cortex. *IEEE Medical Imaging* **20**, 70-80 (2001).

7. Segonne F, Pacheco J, Fischl B. Geometrically accurate topology-correction of cortical surfaces using nonseparating loops. *IEEE Trans Med Imaging* **26**, 518-529 (2007).
8. Reuter M, Schmansky NJ, Rosas HD, Fischl B. Within-Subject Template Estimation for Unbiased Longitudinal Image Analysis. *NeuroImage* **61**, 1402--1418 (2012).
