# Supplementary material for: Exposure to 16 h of normobaric hypoxia induces ionic edema in the healthy brain
Source: PubMed Central journal article supplement (PMC8514510; doi:10.1038/s41467-021-26116-y), 2021-10-13
Supplement: 41467_2021_26116_MOESM3_ESM.pdf [file 41467_2021_26116_MOESM3_ESM.pdf]

## Reporting Summary

Nature Research wishes to improve the reproducibility of the work that we publish. This form provides structure for consistency and transparency in reporting. For further information on Nature Research policies, see our [Editorial Policies](#) and the [Editorial Policy Checklist](#).

### Statistics

For all statistical analyses, confirm that the following items are present in the figure legend, table legend, main text, or Methods section.

n/a Confirmed

- The exact sample size ( $n$ ) for each experimental group/condition, given as a discrete number and unit of measurement
- A statement on whether measurements were taken from distinct samples or whether the same sample was measured repeatedly
- The statistical test(s) used AND whether they are one- or two-sided  
*Only common tests should be described solely by name; describe more complex techniques in the Methods section.*
- A description of all covariates tested
- A description of any assumptions or corrections, such as tests of normality and adjustment for multiple comparisons
- A full description of the statistical parameters including central tendency (e.g. means) or other basic estimates (e.g. regression coefficient) AND variation (e.g. standard deviation) or associated estimates of uncertainty (e.g. confidence intervals)
- For null hypothesis testing, the test statistic (e.g.  $F$ ,  $t$ ,  $r$ ) with confidence intervals, effect sizes, degrees of freedom and  $P$  value noted  
*Give  $P$  values as exact values whenever suitable.*
- For Bayesian analysis, information on the choice of priors and Markov chain Monte Carlo settings
- For hierarchical and complex designs, identification of the appropriate level for tests and full reporting of outcomes
- Estimates of effect sizes (e.g. Cohen's  $d$ , Pearson's  $r$ ), indicating how they were calculated

*Our web collection on [statistics for biologists](#) contains articles on many of the points above.*

### Software and code

Policy information about [availability of computer code](#)

Data collection

## Data analysis

MR data were analyzed using

- FreeSurfer freesurfer-Darwin-lion-stable-pub-v5.3.0
- recon-all version 1.379.2.73, part of FreeSurfer

  

- FSL version 5.0.10
- sienax, part of FSL (version 5.0.10)
- fslmaths, part of FSL (version 5.0.10)
- asl\_file, part of FSL (version 5.0.10)
- fast, part of FSL (version 5.0.10)
- oxford\_asl, part of FSL (version 5.0.10)
- FLIRT version 6.0, part of FSL
- mcflirt, part of FSL (version 6.0)
- BET version 2.1, part of FS

  

- 3D slicer (version 4.8.1)
- PkModelling (version 4.10), 3D slicer module

  

- Horos (version 3.3.6)
- IB DCE (version 20.11), Horos plugin

All statistical analysis were conducted using R (version 4.0.3)

For manuscripts utilizing custom algorithms or software that are central to the research but not yet described in published literature, software must be made available to editors and reviewers. We strongly encourage code deposition in a community repository (e.g. GitHub). See the Nature Research [guidelines for submitting code & software](#) for further information.

## Data

Policy information about [availability of data](#)

All manuscripts must include a [data availability statement](#). This statement should provide the following information, where applicable:

- Accession codes, unique identifiers, or web links for publicly available datasets
- A list of figures that have associated raw data
- A description of any restrictions on data availability

The data that have been generated in this study are available in the open science framework with the identifier DOI 10.17605/OSF.IO/V9H87[<http://dx.doi.org/10.17605/OSF.IO/V9H87>].  
 Figures 3 and 4 have associated raw data provided as source data file.

## Field-specific reporting

Please select the one below that is the best fit for your research. If you are not sure, read the appropriate sections before making your selection.

Life sciences       Behavioural & social sciences       Ecological, evolutionary & environmental sciences

For a reference copy of the document with all sections, see [nature.com/documents/nr-reporting-summary-flat.pdf](https://www.nature.com/documents/nr-reporting-summary-flat.pdf)

## Life sciences study design

All studies must disclose on these points even when the disclosure is negative.

|                 |                                                                                                                                                                                                                                                                                                     |
|-----------------|-----------------------------------------------------------------------------------------------------------------------------------------------------------------------------------------------------------------------------------------------------------------------------------------------------|
| Sample size     | Sample size was determined based on power analyses assuming a medium effect size (GPower; Faul F, Erdfelder E, Buchner A, Lang A-G. Statistical power analyses using G*Power 3.1: Tests for correlation and regression analyses. Behavior Research Methods 41, 1149-1160, 2009), and a beta of 0.8. |
| Data exclusions | Data exclusion was done separately for each statistical test, to-be-excluded outliers were defined as values smaller or larger than 3 standard deviations than the mean for t-tests and 2 standard deviations for correlation analyses, as the latter are more sensitive to outliers.               |
| Replication     | The experimental manipulation was replicated for each participant.                                                                                                                                                                                                                                  |
| Randomization   | Each participant was tested under the same experimental conditions, there were no groups in this study. The design relies on a within-participant comparison of values obtained before and after the experimental manipulation.                                                                     |
| Blinding        | There were no groups in this study, the design relies on a within-participant comparison of values obtained before and after the experimental manipulation. Therefore, blinding is not applicable, there is simply no information that could be subject to blinding.                                |

## Reporting for specific materials, systems and methods

We require information from authors about some types of materials, experimental systems and methods used in many studies. Here, indicate whether each material, system or method listed is relevant to your study. If you are not sure if a list item applies to your research, read the appropriate section before selecting a response.

## Materials &amp; experimental systems

|                                     |                                                                 |
|-------------------------------------|-----------------------------------------------------------------|
| n/a                                 | Included in the study                                           |
| <input checked="" type="checkbox"/> | <input type="checkbox"/> Antibodies                             |
| <input checked="" type="checkbox"/> | <input type="checkbox"/> Eukaryotic cell lines                  |
| <input checked="" type="checkbox"/> | <input type="checkbox"/> Palaeontology and archaeology          |
| <input checked="" type="checkbox"/> | <input type="checkbox"/> Animals and other organisms            |
| <input type="checkbox"/>            | <input checked="" type="checkbox"/> Human research participants |
| <input checked="" type="checkbox"/> | <input type="checkbox"/> Clinical data                          |
| <input checked="" type="checkbox"/> | <input type="checkbox"/> Dual use research of concern           |

## Methods

|                                     |                                                            |
|-------------------------------------|------------------------------------------------------------|
| n/a                                 | Included in the study                                      |
| <input checked="" type="checkbox"/> | <input type="checkbox"/> ChIP-seq                          |
| <input checked="" type="checkbox"/> | <input type="checkbox"/> Flow cytometry                    |
| <input type="checkbox"/>            | <input checked="" type="checkbox"/> MRI-based neuroimaging |

## Human research participants

Policy information about [studies involving human research participants](#)

|                            |                                                                                                                                                                                                                                                                                  |
|----------------------------|----------------------------------------------------------------------------------------------------------------------------------------------------------------------------------------------------------------------------------------------------------------------------------|
| Population characteristics | 23 healthy, non-smoking, non-anaemic individuals (1 female; age: $25 \pm 3$ years; body mass index $22.6 \pm 1.6$ kg/m <sup>2</sup> ; height: $182 \pm 6$ cm)                                                                                                                    |
| Recruitment                | Posters at the University and in sports facilities in the community. This resulted in a very homogeneous sample of mostly young men. As outlined in our Discussion, we refrain from analyzing any predictors of altitude mountain sickness due to the homogeneity of the sample. |
| Ethics oversight           | Ethics Committee of the Medical Department of the University of Heidelberg                                                                                                                                                                                                       |

Note that full information on the approval of the study protocol must also be provided in the manuscript.

## Magnetic resonance imaging

## Experimental design

|                                 |                                                                                                                                                                              |
|---------------------------------|------------------------------------------------------------------------------------------------------------------------------------------------------------------------------|
| Design type                     | pre- and post MR scans with artificially induced normobaric hypoxia in between                                                                                               |
| Design specifications           | all participants were exposed to 16 hours under hypoxic conditions, MR scans were obtained before and after the exposure; there were no trials or blocks in this experiment. |
| Behavioral performance measures | No behavioral performance measures were obtained.                                                                                                                            |

## Acquisition

|                               |                                                                                                                                                                                                                                                                                                                                                                                                                                                                                                                                                                                                                                                                                                                                                                                                                                                                                                                                                                                     |
|-------------------------------|-------------------------------------------------------------------------------------------------------------------------------------------------------------------------------------------------------------------------------------------------------------------------------------------------------------------------------------------------------------------------------------------------------------------------------------------------------------------------------------------------------------------------------------------------------------------------------------------------------------------------------------------------------------------------------------------------------------------------------------------------------------------------------------------------------------------------------------------------------------------------------------------------------------------------------------------------------------------------------------|
| Imaging type(s)               | structural, diffusion, perfusion, sodium, DCE                                                                                                                                                                                                                                                                                                                                                                                                                                                                                                                                                                                                                                                                                                                                                                                                                                                                                                                                       |
| Field strength                | 3T                                                                                                                                                                                                                                                                                                                                                                                                                                                                                                                                                                                                                                                                                                                                                                                                                                                                                                                                                                                  |
| Sequence & imaging parameters | <p>STRUCTURAL</p> <ul style="list-style-type: none"> <li>- sequence type: tfl (single-shot TurboFLASH sequence)</li> <li>- imaging type (FLASH)</li> <li>- Fov 256 mm</li> <li>- matrix size 256</li> <li>- slice thickness 1 mm</li> <li>- orientation sagittal</li> <li>- TR / TE / flip angle 1570 ms / 2.63 ms / 9 dg</li> </ul> <p>PERFUSION</p> <ul style="list-style-type: none"> <li>- sequence type: ep2d_pasl (single-shot FID EPI sequence)</li> <li>- pulsed arterial spin labelling (PICOE Q2TIPS)</li> <li>- imaging type (EPI)</li> <li>- Fov 230 mm</li> <li>- matrix size 64</li> <li>- slice thickness 3.6 mm</li> <li>- orientation axial</li> <li>- TR / TE / flip angle 2500 ms / 9.9 ms / 90 dg</li> </ul> <p>DCE</p> <ul style="list-style-type: none"> <li>- sequence type: fl3d_vibe (gradient echo)</li> <li>- imaging type (GE)</li> <li>- Fov 256 mm</li> <li>- matrix size 256</li> <li>- slice thickness 5 mm</li> <li>- orientation axial</li> </ul> |

- TR / TE / flip angle 5.28 ms / 2.45 ms / 10 dg

#### SODIUM

##### ATS

- sequence type: density-adapted 3D radial projection reconstruction pulse sequence
- imaging type (Radial)
- Fov 286 mm
- matrix size 64
- slice thickness 4.5 mm
- orientation n.a.
- TR / TE / flip angle 160 ms / 0.3 ms / 0 dg

##### FAS

- sequence type: density-adapted 3D radial projection reconstruction pulse sequence
- imaging type (Radial)
- Fov 286 mm
- matrix size 52
- slice thickness 5.5 mm
- orientation n.a.
- TR / TE / flip angle 160 ms / 0.3 ms / 0 dg

Area of acquisition

Whole brain

Diffusion MRI

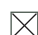

Used

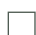

Not used

Parameters

- sequence type: ep2d\_diff (spin-echo EPI sequence)
- imaging type (EPI)
- Fov 210 mm
- matrix size 128
- slice thickness 3 mm
- orientation axial
- TR / TE / flip angle 5100 ms / 72.8 ms / -- dg

## Preprocessing

Preprocessing software

FMRIB'S Software Library FSL (version 5.0.10)  
FreeSurfer (version 5.3.0)  
Tofts --> pkModelling (version 4.8 as module in 3DSlicer version 4.8.1)  
Patlak --> IB DCE (version 20.11)

Normalization

Sodium data of brain parenchyma was normalized to CSF signals. Spatial transformation: Physiologic brain data was linearly registered to anatomical data with 12 degrees of freedom (flirt, Part of FSL).

Normalization template

Talaraich template (as part of the longitudinal stream of FreeSurfer)

Noise and artifact removal

Hamming filter

Volume censoring

For most of the analyses no motion correction was necessary; for ASL-Perfusion data mcflirt of FSL

## Statistical modeling & inference

Model type and settings

Not applicable because the listed types of models refer to fMRI studies or behavioral measures neither of which was obtained in the current study. See 'Effects tested' for information on the statistical analysis.

Effect(s) tested

The difference between pre- and post-exposure measurements normalized by pre-exposure values was tested against zero using t-tests and correlated across ROIs and measures using Pearson's correlation coefficient.

Specify type of analysis:

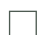

Whole brain

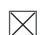

ROI-based

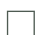

Both

Anatomical location(s)

FreeSurfer parcellations

Statistic type for inference  
(See [Eklund et al. 2016](#))

All inferences were based on ROI-based statistics, i.e., mean values across all voxels within a ROI

Correction

Benjamini & Hochberg FDR correction

## Models & analysis

n/a | Involved in the study

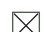

Functional and/or effective connectivity

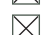

Graph analysis

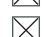

Multivariate modeling or predictive analysis
